# Supplementary material
Source: PubMed Central journal article supplement (PMC7109008)
Supplement: NIHMS1574919-supplement-1574919_Supp_Fig1-2.pdf [file NIHMS1574919-supplement-1574919_Supp_Fig1-2.pdf]

## **Electronic Supplementary Material**

### **Evaluating the Role of Amide-Proton-Transfer (APT) Weighted Contrast, Optimized for Normalization and Regions of Interest Selection, in Differentiation of Neoplastic and Infective Mass Lesions on 3T MRI**

**Journal: Molecular Imaging and Biology**

Ayan Debnath<sup>1</sup>, Rakesh Kumar Gupta<sup>2</sup>, Anup Singh<sup>1,3</sup>

<sup>1</sup>Centre for Biomedical Engineering, Indian Institute of Technology Delhi, India

<sup>2</sup>Fortis Memorial Research Institute, Gurgaon, India

<sup>3</sup>Department of Biomedical Engineering, All India Institute of Medical Sciences, India

#### **Corresponding author postal address**

Dr. Anup Singh

Block-II, Room No. 299, Center for Biomedical Engineering,  
Indian Institute of Technology Delhi, New Delhi -110016, India

Tel: [+91-11-2659-1055\(O\)](tel:+91-11-2659-1055)

Email: [anupsm@iitd.ac.in](mailto:anupsm@iitd.ac.in) / [anupsmri@gmail.com](mailto:anupsmri@gmail.com) / [anups.minhas@gmail.com](mailto:anups.minhas@gmail.com)

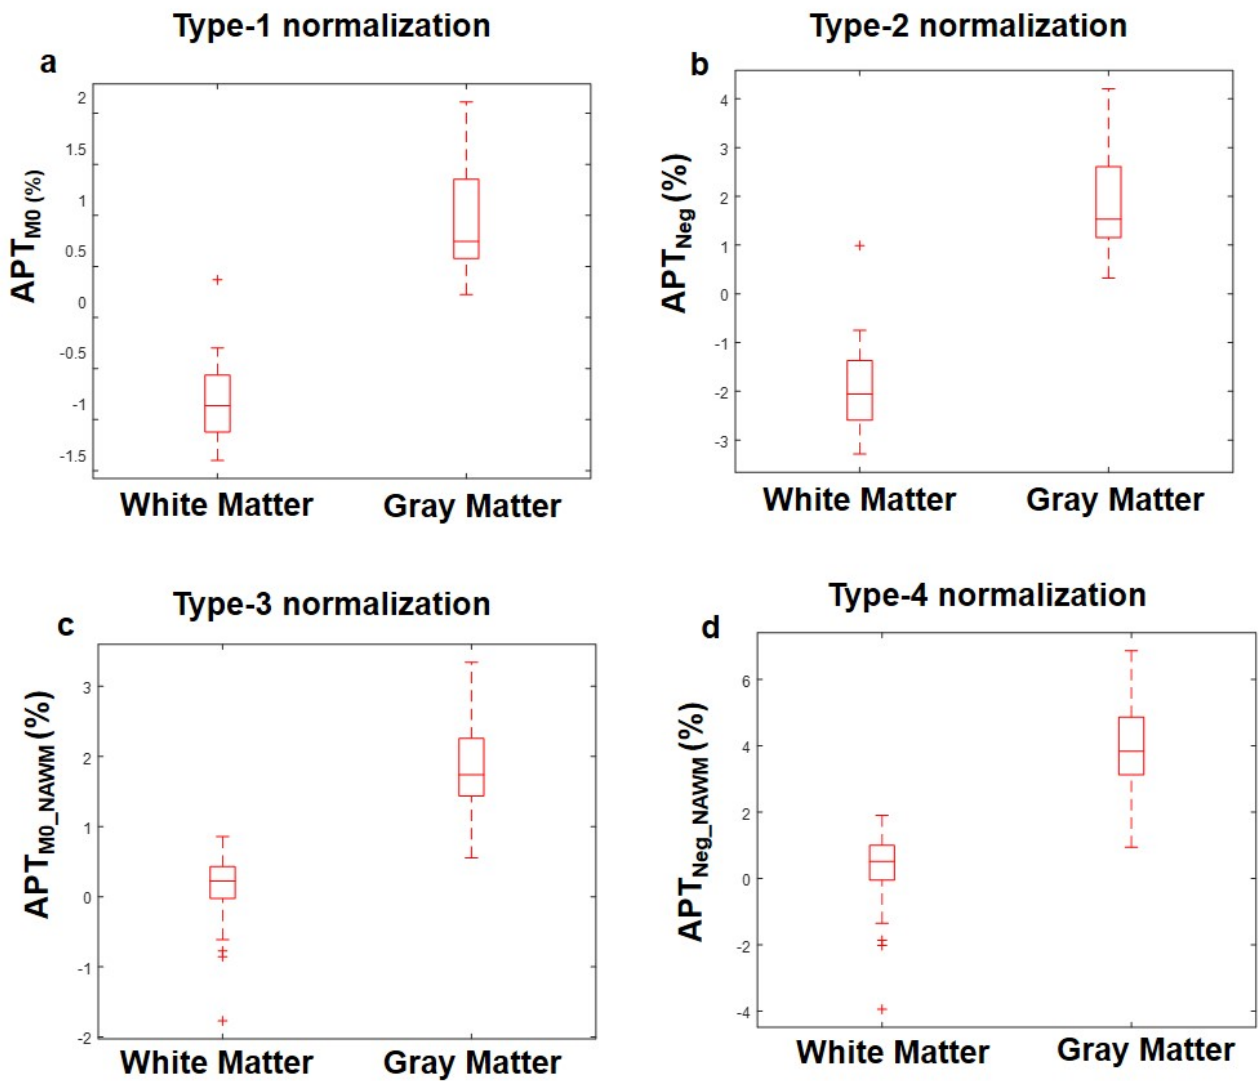

**Supplementary figure 1.** Box and whisker plots showing ROI analysis of APT-weighted(w) contrast in white matter (WM) and grey matter (GM) for Type-1, Type-2, Type-3 and Type-4 normalizations. APT-w contrast for WM is mostly negative and lesser than GM. Type-1, Type-2, Type-3 and Type-4 normalizations represents  $APT_{M0}$ ,  $APT_{Neg}$ ,  $APT_{M0\_NAWM}$  and  $APT_{Neg\_NAWM}$  contrast respectively.

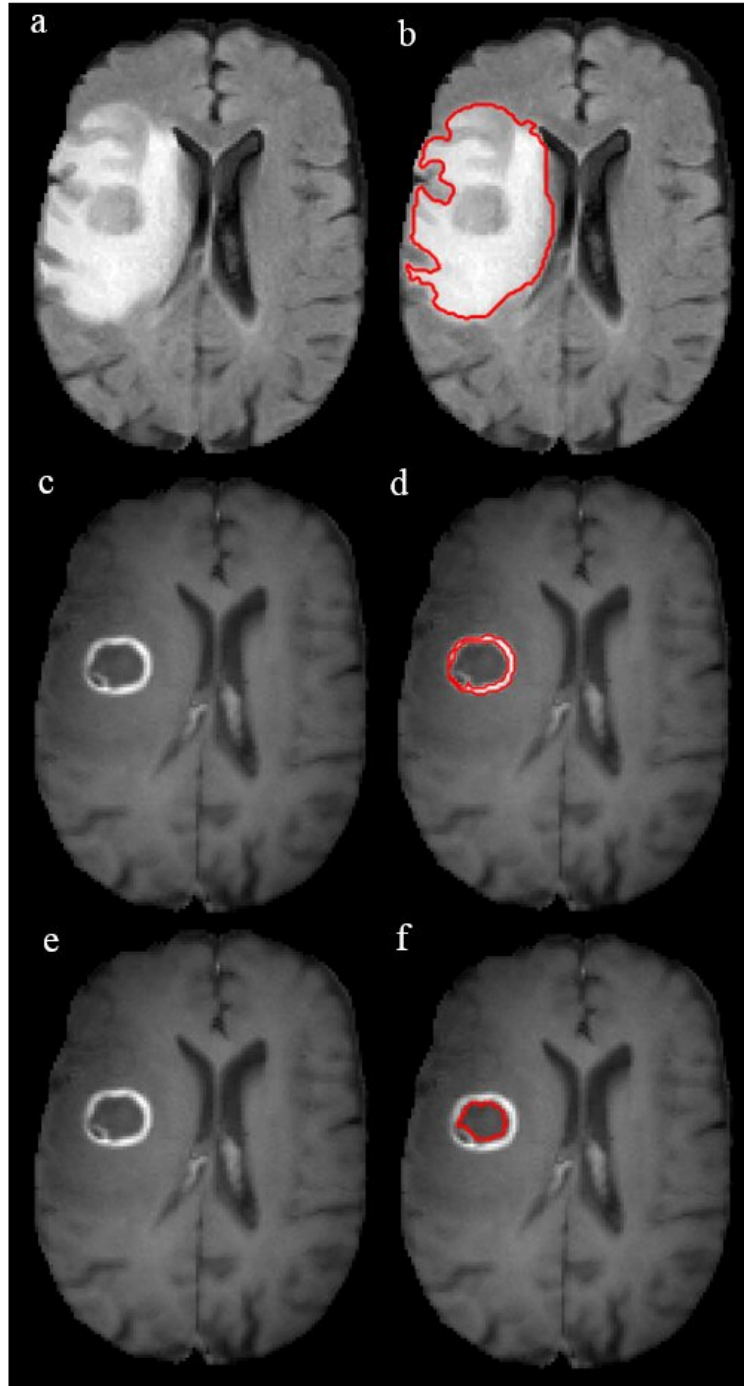

**Supplementary figure 2.** Placement of ROIs on a representative case of high grade glioma. (a) FLAIR image, (b) selection of entire tumor region on that FLAIR image, (c) post-contrast T<sub>1</sub>-weighted (PC T<sub>1</sub>-w), (d) selection of active tumor region on that PC T<sub>1</sub>-w image, (e) PC T<sub>1</sub>-w image and (f) selection of necrotic tumor region on PC T<sub>1</sub>-w image.
